# Supplementary material
Source: PubMed Central journal article supplement (PMC1236532)
Supplement: pnas_0502390102_2.pdf [file pnas_0502390102_2.pdf]

|            |                                                                                                                                                                                                                                                  |                                                                                                                                                                                                                                                                     |                                                                                                                                                                                                                                                                                                                                                                                                                                                                                                                                                                                                                                                                   |
|------------|--------------------------------------------------------------------------------------------------------------------------------------------------------------------------------------------------------------------------------------------------|---------------------------------------------------------------------------------------------------------------------------------------------------------------------------------------------------------------------------------------------------------------------|-------------------------------------------------------------------------------------------------------------------------------------------------------------------------------------------------------------------------------------------------------------------------------------------------------------------------------------------------------------------------------------------------------------------------------------------------------------------------------------------------------------------------------------------------------------------------------------------------------------------------------------------------------------------|
| <b>Ia</b>  | mCor-1A (430-461)<br>hCor-1A (430-461)<br>bCor-1A (430-461)<br>rCor-1A (430-461)<br>mCor-1B (448-482)<br>mCor-1C (441-474)<br>ddCor (412-445)<br>xlCor-A (441-480)<br>xlCor-B (441-480)<br>scCor (618-651)<br>ceCor (566-605)<br>dmCor (457-491) |                                                                                                                                                                                                                                                                     | VSRLEED-VRNLNAI-VQKLQER- <b>LDRI</b> LEET-VQAK*<br>ISRLEEE-MRKLQAT-VQELQKR- <b>LDRI</b> LEET-VQAK*<br>VSRLEEE-MRKLQAT-VQELQKR- <b>LDRI</b> LEET-VQAK*<br>VSRLEED-VRNLNAI-VQKLQER- <b>LDRI</b> LEET-VQAK*<br>LEEVMQE-LRALRML-VKEQGER- <b>ISR</b> LEEQ-LGRMENG-DA*<br>LDEILKE-IKSIKET-ICSQDER- <b>ISK</b> LEQQ-LAKMAA*<br>EKEFREE-YEKLKIR- <b>VAY</b> LESE-IVKKDAK-IKELTN*<br>VDDIMME-LRSMKET-MRRHGER- <b>IAK</b> LEDI-VASLTIN-DESEE*<br>MDDIMKE-LRSMKET-IRCQADR- <b>IDK</b> LEEL-VASLTIN-DESEE*<br>VLQLEDV-VDKLTKA-NLDKDER- <b>LLK</b> LEQK-IGELSK*<br>MDELLED-IMMKAV-LRQHERR- <b>IRM</b> LEEE-IADRNMS-NAYSF*<br>LRTIQDE-IRKLIKAI-IVKQENR- <b>IRA</b> LEAK-EDARNKN |
| <b>Ib</b>  | hHSBP1 (9-58)<br>rHSBP1 (9-58)<br>drHSBP1 (9-58)<br>athSBP1 (15-62)<br>dmHSBP1 (27-76)<br>ceHSBP1 (21-70)<br>ddHSBP1 (32-73)<br>spHSBP1 (15-64)                                                                                                  | VQDL-TSVVQTL-LQQMQDK-FQTMSDQ-<br>MQDI-TLVVETL-LQQMQDK-FQIMSDQ-<br>VQDL-TAVVQTL-LQQMQDK-FQTMSDQ-<br>TADM-TAFVQNL-LQQMQTR-FQTMSSD-<br>MQEL-TIYVQNL-LQNVQDK-FQTMSDQ-<br>MNDL-TSLIQGV-LQQTQDR-FQHMSDQ-<br>DVLI-GNVVQNL-LEQMQR-FEKVSES-<br>TSAI-TTLTDKL-LEDISGD-FETLQKQ- | IIGR-IDDMSSR- <b>IDD</b> LEKN-IADLMTQ<br>IIGR-IDDMSSR- <b>IDD</b> LEKN-IADLMTQ<br>IIGR-IDEMSTR- <b>IDD</b> LEKN-IADLMTQ<br>IITK-IDDMGGR- <b>INE</b> LEQS-INDLRAE<br>IITR-IDDMGGR- <b>IDD</b> LEKS-IADLMTQ<br>IIRR-IDDMSTR- <b>IDD</b> LEKN-INDLMSQ<br>ILTR-IDEMGOR- <b>IDE</b> LDKS-ISDMLQ<br>FSEK-LETMSTR- <b>LDD</b> LEES-MREAMNK                                                                                                                                                                                                                                                                                                                               |
| <b>IIa</b> | hTN-C (116-139)<br>pTN-C (116-139)<br>mTN-C (116-139)<br>chTN-C (116-139)<br>hTN-X (96-120)<br>hTN-R (131-154)<br>mTN-W/N (102-125)<br>chTN-Y (38-61)                                                                                            |                                                                                                                                                                                                                                                                     | APD-VKELLSR- <b>LEE</b> LENL-VSSLREQ<br>APD-VKELLSR- <b>LEE</b> LENL-VSSLREQ<br>APD-IKELLSR- <b>LEE</b> LELL-VSSLREQ<br>APD-VKDLSR- <b>LEE</b> LEGL-VSSLREQ<br>LASE-VQALRVR- <b>LEI</b> LEEL-VKGLKEQ<br>AQV-LQELLSR- <b>IEM</b> LERE-VSVLRDQ<br>ADS-VQDLLAR- <b>MKK</b> LEEE-MAELKEQ<br>AEV-LEAVLGR- <b>LRA</b> LEGE-VRALQQQ                                                                                                                                                                                                                                                                                                                                      |
| <b>IIb</b> | hMat-1 (463-496)<br>mMat-1 (467-500)<br>rMat-1 (465-498)<br>chMat-1 (460-493)<br>drMat-1 (474-507)<br>hMat-2 (921-956)<br>mMat-2 (921-956)<br>hMat-4 (584-619)<br>mMat-4 (588-624)<br>drMat-4 (788-820)                                          |                                                                                                                                                                                                                                                                     | LVKF-QAKVEGL-LQALTRK-LEAVSKR- <b>LAI</b> LENT-VV*<br>LKFE-QAKVEGL-LQALTRK-LEAVSGR- <b>LAV</b> LENR-II*<br>IVRF-EAKVEGL-LQDLTRK-LEAVSKR- <b>LAV</b> LENR-VI*<br>IVKF-QTKVEEL-INTLQOK-LEAVAKR- <b>IEA</b> LENK-II*<br>ITKF-QKKVEEA-LQALTKK-LEAVTKR- <b>IAA</b> LENK-IV*<br>LIMF-QNLANEE-VRKLTQR-LEEMTQR- <b>MEA</b> LENR-LRYR*<br>LILF-QNVANEE-VRKLTQR-LEEMTQR- <b>MEA</b> LENR-LKYR*<br>LVEF-QGRTLGA-LESFTLN-LAQLTAR- <b>LED</b> LENQ-LANQK*<br>LVEF-QGRTLGA-LESFTQN-LARLTER- <b>LEE</b> LENQ-LASRK*<br>LVEF-QQVTMST-IEQLNQK-LSAMTKR- <b>LEV</b> LEKQ-LL*                                                                                                          |
| <b>IIc</b> | hXXVI_a1 (134-156)<br>bCollectin43 (167-197)                                                                                                                                                                                                     |                                                                                                                                                                                                                                                                     | LSDMSER- <b>LTT</b> LEAK-VLLLEAA-EQ<br>VDTLRQR- <b>MRN</b> LEGE-VQRLQNI-VTQYRKA-VLF                                                                                                                                                                                                                                                                                                                                                                                                                                                                                                                                                                               |
| <b>III</b> | hXIII_a1 (62-82)<br>hXXIII_a1 (51-65)<br>hXXV_a1 (49-73)<br>hXVII_a1 (486-509)<br>hMARCO (60-84)                                                                                                                                                 |                                                                                                                                                                                                                                                                     | SLLAHFR-TAELQAR- <b>VLR</b> LEAE-RGEQ<br>CLLLGVQ-AAALQGR- <b>VAA</b> LEEE-RELL<br>CLYLYGK-TNDLQAR- <b>IAA</b> LESA-KGAP<br>LIALAEE-VRKLLAR- <b>VDE</b> LERI-RRSI<br>AGLLVVQ-VLNLQAR- <b>LRV</b> LEMY-FLND                                                                                                                                                                                                                                                                                                                                                                                                                                                         |
| <b>IVa</b> | HIV-1 (545-589)<br>SIV (547-591)<br>Visna (700-744)<br>CAEV (666-710)<br>FIV (645-689)<br>BIV (562-606)                                                                                                                                          | LSGIVQQ-QNNLLRA-IEAQOHL-LQLTVWG-<br>LAGIVQQ-QQQLLDV-VKRQOEL-LRLTVWG-<br>VQSLANA-TAAQQNV-LEATYAM-VQHVAKG-<br>VQTLANA-TAAQODA-LEATYAM-VQHVAKG-<br>LATHQET-IEKVTEA-LKINNLR-<br>VERVVQN-VSYIAQT-QDQFTHL-FRNINNR-                                                        | IKQLQAR- <b>ILA</b> VERY-LKD<br>TKNLQTR- <b>VSA</b> LEKY-LKD<br>VRILEAR- <b>VAR</b> VEVL-VDR<br>VRILEAR- <b>VAR</b> VEAI-TDR<br>LVTLEHQ-VLVIGLK-VEAMEKF-LYT<br>LNVLHRR- <b>VSY</b> LEYV-EEI                                                                                                                                                                                                                                                                                                                                                                                                                                                                       |
| <b>IVb</b> | HA2 (45-86)                                                                                                                                                                                                                                      | IDQINRK-LNRVIEK-                                                                                                                                                                                                                                                    | TNEK-FHQIEKE-FSEVEGR- <b>IQD</b> LEKY-VED                                                                                                                                                                                                                                                                                                                                                                                                                                                                                                                                                                                                                         |
| <b>IVc</b> | MHV (995-1043)<br>HCoV-SARS (927-975)<br>HCoV-OC43 (1029-1077)                                                                                                                                                                                   | LGKIQSV-VNANAQA-LNNLLNQ-<br>LGKLQDV-VNQAQA-LNTLVKQ-<br>LVKIQAV-VNANAQA-LNNLLQQ-                                                                                                                                                                                     | LSNR-FGAISAS-LQEIILTR- <b>LEA</b> VEAK-AQI<br>LSSN-FGAISSV-LNDILSR- <b>LDK</b> VEAE-VQI<br>LSNR-FGAISAS-LQEIILSR- <b>LDA</b> LEAE-AQI                                                                                                                                                                                                                                                                                                                                                                                                                                                                                                                             |
| <b>V</b>   | ccβ-p (1-17)<br>p1 (1-15)<br>P4 (1-15)<br>GCN4p-Cort T/L (1-31)<br><br>consensus:                                                                                                                                                                |                                                                                                                                                                                                                                                                     | S-IRELEAR- <b>IRE</b> LELR-IG*<br>DELERR- <b>IRE</b> LEAR-IK*<br>EELRRR- <b>IEE</b> LERR-IR*<br>MKQLEDK-VEELLSSK-NMELEAR- <b>LAK</b> LEKD-VGE*<br><br><b>R-hxxhE</b>                                                                                                                                                                                                                                                                                                                                                                                                                                                                                              |
