# Supplementary material
Source: PubMed Central journal article supplement (PMC1236532)

**A**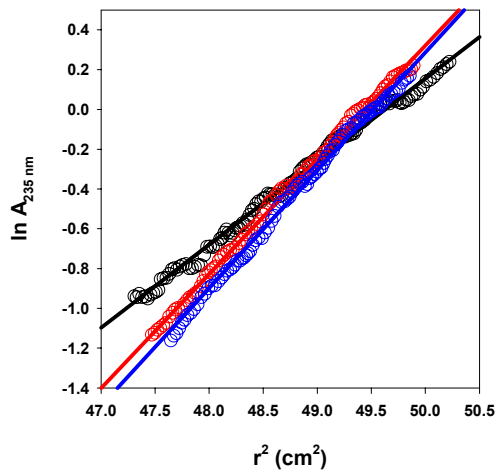**B**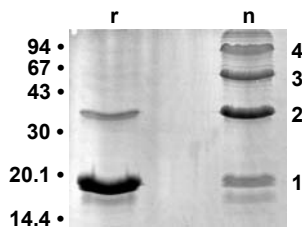**C**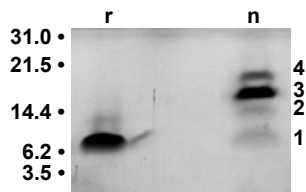

Supplement: pnas_0502390102_1.pdf [file pnas_0502390102_1.pdf]
